# Supplementary material for: Spatiotemporal 22q11.21 Protein Network Implicates DGCR8-Dependent MicroRNA Biogenesis as a Risk for Late Fetal Cortical Development in Psychiatric Diseases
Source: MDPI journal article supplement (doi:10.3390/life11060514), 2021-05-31
Supplement: s1 [file s1]

# Spatiotemporal 22q11.21 Protein Network Implicates DGCR8-Dependent MicroRNA Biogenesis as a Risk for Late-Fetal Cortical Development in Psychiatric Diseases

## 1. Supplemental Figures

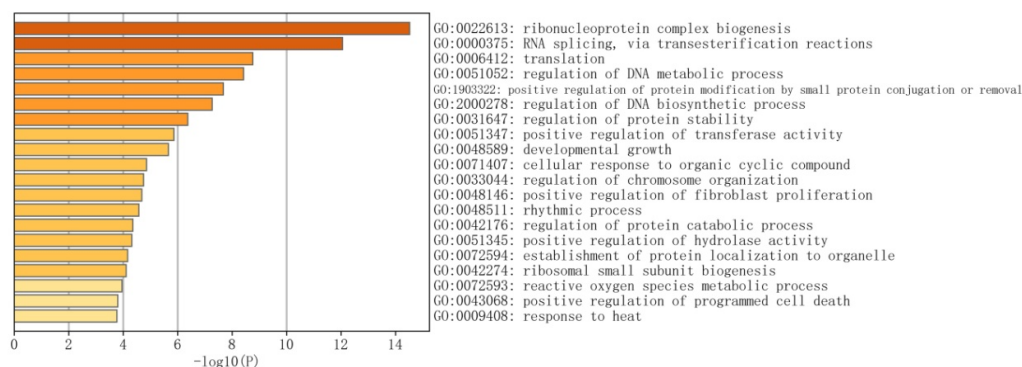

**Figure S1.** The significant enriched biological process of 158 partners only from the P4R1 network.

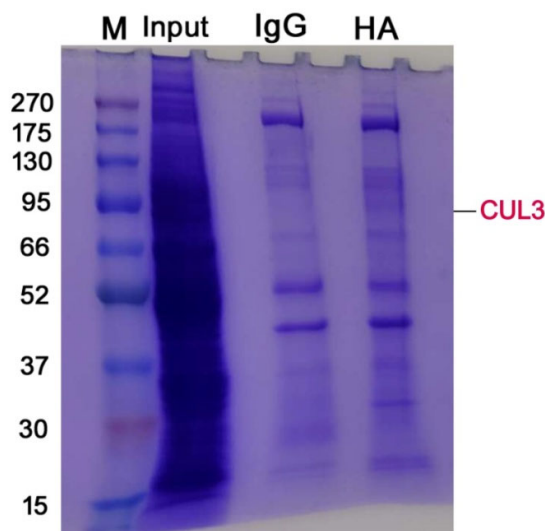

**Figure S2.** SDS-PAGE separation of the immunoprecipitated proteins. Cell lysate proteins were immunoprecipitated using control IgG or HA antibody. Several protein bands that are unique identified by LC-MS/MS were listed on the right side of the panel.

## 2. Supplemental Tables

**Table S1.** Genes within the22q11.21 copy number variation

| Gene ID | Gene Symbole | Official Full Name | Position (hg38) | Size |
|---------|--------------|--------------------|-----------------|------|
|---------|--------------|--------------------|-----------------|------|

|        |          |                                                             |                                   |         |
|--------|----------|-------------------------------------------------------------|-----------------------------------|---------|
| 8214   | DGCR6    | DiGeorge syndrome critical region gene 6                    | chr22:18,906,320-18,914,238       | 7,919   |
| 5625   | PRODH    | proline dehydrogenase 1                                     | chr22:18,912,777-18,936,553       | 23,777  |
| 9993   | DGCR2    | DiGeorge syndrome critical region gene 2                    | chr22:19,036,282-19,122,454       | 86,173  |
| 8220   | ESS2     | ess-2 splicing factor homolog                               | chr22:19,130,279-19,144,651       | 14,373  |
| 23617  | TSSK2    | testis specific serine kinase 2                             | chr22:19,131,308-19,132,622       | 1,315   |
| 6576   | SLC25A1  | solute carrier family 25 member 1                           | chr22:19,175,581-19,178,736       | 3,156   |
| 8218   | CLTCL1   | clathrin heavy chain like 1                                 | chr22:19,179,476-19,207,676       | 28,201  |
| 7290   | HIRA     | histone cell cycle regulator                                | chr22:19,330,698-19,431,696       | 100,999 |
| 64976  | MRPL40   | mitochondrial ribosomal protein L40                         | chr22:chr22:19,431,902-19,436,075 | 4,174   |
| 128977 | C22orf39 | chromosome 22 open reading frame 39                         | chr22:19,440,886-19,447,692       | 6,807   |
| 7353   | UFD1L    | ubiquitin recognition factor in ER associated degradation 1 | chr22:19,449,911-19,479,193       | 29,283  |
| 8318   | CDC45    | cell division cycle 45                                      | chr22:19,479,457-19,520,612       | 41,156  |
| 7122   | CLDN5    | claudin 5                                                   | chr22:19,523,024-19,527,545       | 4,522   |
| 5413   | SEPTIN5  | septin 5                                                    | chr22:19,714,503-19,723,319       | 8,817   |
| 2812   | GP1BB    | glycoprotein Ib platelet subunit beta                       | chr22:19,722,945-19,724,771       | 1,827   |
| 54584  | GNB1L    | G protein subunit beta 1 like                               | chr22:19,788,418-19,854,939       | 66,522  |
| 79680  | C22orf29 | retrotransposon Gag like 10                                 | chr22:19,441,777-19,448,232       | 6,456   |
| 10587  | TXNRD2   | thioredoxin reductase 2                                     | chr22:19,875,518-19,938,179       | 62,662  |
| 1312   | COMT     | catechol-O-methyltransferase                                | chr22:19,941,607-19,969,975       | 28,369  |
| 421    | ARVCF    | ARVCF delta catenin family member                           | chr22:19,969,896-20,016,823       | 46,928  |
| 128989 | TANGO2   | transport and golgi organization 2 homolog                  | chr22:20,017,014-20,065,358       | 48,345  |
| 54487  | DGCR8    | DGCR8 microprocessor complex subunit                        | chr22:20,080,232-20,111,875       | 31,644  |
| 27037  | TRMT2A   | tRNA methyltransferase 2 homolog A                          | chr22:20,111,875-20,117,392       | 5,518   |
| 5902   | RANBP1   | RAN binding protein 1                                       | chr22:20,117,424-20,127,355       | 9,932   |
| 65078  | RTN4R    | reticulon 4 receptor                                        | chr22:20,242,849-20,283,246       | 40,398  |
| 85359  | DGCR6L   | DiGeorge syndrome critical region gene 6 like               | chr22:18,906,364-18,911,620       | 5,257   |

**Table S2.** Developmental brain period from the BrainSpan related to Figure 1

| Stage | Description     | Age       | Developmental Period |
|-------|-----------------|-----------|----------------------|
| 1     | Early fetal     | 8–9 PCW   | P1                   |
| 2     | Early fetal     | 10–12 PCW |                      |
| 3     | Early mid-fetal | 13–15 PCW |                      |
| 4     | Early mid-fetal | 16–18 PCW | P2                   |
| 5     | Late mid-fetal  | 19–23 PCW |                      |
| 6     | Late fetal      | 24–37 PCW | P3                   |
| 7     | Early infancy   | 0–5 M     | P4                   |
| 8     | Late infancy    | 6–11 M    |                      |
| 9     | Early childhood | 1–5 Yr    | P5                   |
| 10    | late childhood  | 6–11 Yr   |                      |
| 11    | Adolescence     | 12–19 Yr  | P6                   |
| 12    | Young adulthood | 20–39 Yr  | P7                   |

**Table S3.** Four brain regions and the anatomical structures

| Brain Structure                                   | Brain Region |
|---------------------------------------------------|--------------|
| Posteroinferior (ventral) parietal cortex (IPC)   | R1           |
| Primary auditory cortex (A1C)                     | R1           |
| Posterior (caudal) superior temporal cortex (STC) | R1           |
| Inferolateral temporal cortex (ITC)               | R1           |

|                                                               |    |
|---------------------------------------------------------------|----|
| Primary visual cortex (V1C)                                   | R1 |
| The dorsolateral prefrontal cortex (DFC)                      | R2 |
| Ventrolateral prefrontal cortex (VFC)                         | R2 |
| Anterior (rostral) cingulate (medial prefrontal) cortex (MFC) | R2 |
| Orbital frontal cortex (OFC)                                  | R2 |
| Primary motor cortex (M1C)                                    | R2 |
| Primary somatosensory cortex (S1C)                            | R2 |
| Hippocampus                                                   | R3 |
| Amygdaloid complex                                            | R3 |
| Striatum                                                      | R3 |
| The mediodorsal nucleus of the thalamus (MD)                  | R4 |
| Cerebellar cortex (CBC)                                       | R4 |

**Table S4.** Sharing 22q11.21 CNV genes for three spatiotemporal networks (P2R1, P2R2, and P4R1).

| No. | Gene ID | Gene Symbol |
|-----|---------|-------------|
| 1   | 8318    | CDC45       |
| 2   | 23617   | TSSK2       |
| 3   | 5413    | SEP5        |
| 4   | 7290    | HIRA        |
| 5   | 7353    | UFD1L       |
| 6   | 54487   | DGCR8       |
| 7   | 2812    | GP1BB       |
| 8   | 5902    | RANBP1      |
| 9   | 64976   | MRPL40      |
| 10  | 8220    | DGCR14      |
| 11  | 8214    | DGCR6       |
| 12  | 128989  | TANGO2      |
| 13  | 8218    | CLTCL1      |
| 14  | 6576    | SLC25A1     |
| 15  | 1312    | COMT        |
| 16  | 27037   | TRMT2A      |
| 17  | 65078   | RTN4R       |
| 18  | 5625    | PRODH       |
| 19  | 85359   | DGCR6L      |
| 20  | 10587   | TXNRD2      |
| 21  | 421     | ARVCF       |

**Table S5.** Sharing co-expression interacting partners for three spatiotemporal networks (P2R1, P2R2, and P4R1).

| No. | Gene ID | Gene Symbol |
|-----|---------|-------------|
| 1   | 54550   | NECAB2      |
| 2   | 84062   | DTNBP1      |
| 3   | 8480    | RAE1        |
| 4   | 1762    | DMWD        |
| 5   | 4173    | MCM4        |
| 6   | 10474   | TADA3       |
| 7   | 3396    | ICT1        |
| 8   | 3665    | IRF7        |
| 9   | 64928   | MRPL14      |
| 10  | 79590   | MRPL24      |
| 11  | 54148   | MRPL39      |
| 12  | 51069   | MRPL2       |

---

|    |        |          |
|----|--------|----------|
| 13 | 5713   | PSMD7    |
| 14 | 6390   | SDHB     |
| 15 | 79001  | VKORC1   |
| 16 | 64210  | MMS19    |
| 17 | 84445  | LZTS2    |
| 18 | 4343   | MOV10    |
| 19 | 3611   | ILK      |
| 20 | 3985   | LIMK2    |
| 21 | 6137   | RPL13    |
| 22 | 155435 | RBM33    |
| 23 | 26262  | TSPAN17  |
| 24 | 55559  | HAUS7    |
| 25 | 55630  | SLC39A4  |
| 26 | 5111   | PCNA     |
| 27 | 30968  | STOML2   |
| 28 | 10105  | PPIF     |
| 29 | 1072   | CFL1     |
| 30 | 8928   | FOXH1    |
| 31 | 3607   | FOXK2    |
| 32 | 55611  | OTUB1    |
| 33 | 284106 | CISD3    |
| 34 | 57017  | COQ9     |
| 35 | 388569 | ZNF324B  |
| 36 | 10712  | FAM189B  |
| 37 | 57104  | PNPLA2   |
| 38 | 4998   | ORC1     |
| 39 | 23594  | ORC6     |
| 40 | 4172   | MCM3     |
| 41 | 3609   | ILF3     |
| 42 | 29855  | UBN1     |
| 43 | 1104   | RCC1     |
| 44 | 51258  | MRPL51   |
| 45 | 122704 | MRPL52   |
| 46 | 8449   | DHX16    |
| 47 | 55388  | MCM10    |
| 48 | 7185   | TRAF1    |
| 49 | 55165  | CEP55    |
| 50 | 10487  | CAP1     |
| 51 | 1665   | DHX15    |
| 52 | 51611  | DPH5     |
| 53 | 3030   | HADHA    |
| 54 | 55968  | NSFL1C   |
| 55 | 11331  | PHB2     |
| 56 | 51493  | RTCB     |
| 57 | 10963  | STIP1    |
| 58 | 6612   | SUMO3    |
| 59 | 55622  | TTC27    |
| 60 | 27339  | PRPF19   |
| 61 | 22870  | PPP6R1   |
| 62 | 64794  | DDX31    |
| 63 | 115557 | ARHGEF25 |
| 64 | 339230 | CCDC137  |

---

|    |       |        |
|----|-------|--------|
| 65 | 23367 | LARP1  |
| 66 | 55131 | RBM28  |
| 67 | 9726  | ZNF646 |
| 68 | 10498 | CARM1  |

**Table S6.** Results of ANOVA test for interaction patterns of proteins from P2R1 and P4R1 networks.

| CNV                      | Genes           | Interacting Partners in P2R1 and P4R1 |                                |                 |                               |                      |
|--------------------------|-----------------|---------------------------------------|--------------------------------|-----------------|-------------------------------|----------------------|
| Entrez Gene ID           | Official Symbol | Total Partners                        | Count of Unique to One Network | Freq of Network | Count of Shared by 2 Networks | Freq of Networks     |
| 8214                     | DGCR6           | 24                                    | 19                             | 0.7917          | 5                             | 0.2083               |
| 5625                     | PRODH           | 2                                     | 1                              | 0.5000          | 1                             | 0.5000               |
| 9993                     | DGCR2           | 2                                     | 2                              | 1.0000          | 0                             | 0.0000               |
| 8220                     | ESS2            | 15                                    | 12                             | 0.8000          | 3                             | 0.2000               |
| 23617                    | TSSK2           | 5                                     | 4                              | 0.8000          | 1                             | 0.2000               |
| 6576                     | SLC25A1         | 10                                    | 10                             | 1.0000          | 0                             | 0.0000               |
| 8218                     | CLTCL1          | 7                                     | 7                              | 1.0000          | 0                             | 0.0000               |
| 7290                     | HIRA            | 13                                    | 12                             | 0.9231          | 1                             | 0.0769               |
| 64976                    | MRPL40          | 33                                    | 29                             | 0.8788          | 4                             | 0.1212               |
| 128977                   | C22orf39        | 1                                     | 1                              | 1.0000          | 0                             | 0.0000               |
| 7353                     | UFD1L           | 44                                    | 34                             | 0.7727          | 10                            | 0.2273               |
| 8318                     | CDC45           | 13                                    | 7                              | 0.5385          | 6                             | 0.4615               |
| 7122                     | CLDN5           | 1                                     | 1                              | 1.0000          | 0                             | 0.0000               |
| 5413                     | SEPT5           | 3                                     | 2                              | 0.6667          | 1                             | 0.3333               |
| 2812                     | GP1BB           | 9                                     | 9                              | 1.0000          | 0                             | 0.0000               |
| 54584                    | GNB1L           | 2                                     | 2                              | 1.0000          | 0                             | 0.0000               |
| 10587                    | TXNRD2          | 3                                     | 3                              | 1.0000          | 0                             | 0.0000               |
| 1312                     | COMT            | 12                                    | 12                             | 1.0000          | 0                             | 0.0000               |
| 421                      | ARVCF           | 3                                     | 3                              | 1.0000          | 0                             | 0.0000               |
| 128989                   | TANGO2          | 6                                     | 6                              | 1.0000          | 0                             | 0.0000               |
| 54487                    | DGCR8           | 83                                    | 77                             | 0.9277          | 6                             | 0.0723               |
| 27037                    | TRMT2A          | 22                                    | 21                             | 0.9545          | 1                             | 0.0455               |
| 5902                     | RANBP1          | 6                                     | 6                              | 1.0000          | 0                             | 0.0000               |
| 65078                    | RTN4R           | 2                                     | 1                              | 0.5000          | 1                             | 0.5000               |
| 85359                    | DGCR6L          | 2                                     | 2                              | 1.0000          | 0                             | 0.0000               |
| Summary of ANOVA Test:   |                 |                                       |                                |                 |                               |                      |
| Groups                   |                 | Count                                 | Sum                            | Average         | Variance                      |                      |
| Frequency of interactors |                 |                                       |                                |                 |                               |                      |
| Unique to 1 network      |                 | 25                                    | 22.0536                        | 0.8821          | 0.0283                        |                      |
| Shared by 2 network      |                 | 25                                    | 2.9464                         | 0.1179          | 0.0283                        |                      |
| Result:                  |                 |                                       |                                |                 |                               |                      |
| Source of variation      |                 | SS                                    | df                             | MS              | F                             | p-value              |
| Between Groups           |                 | 7.302                                 | 1                              | 7.302           | 257.8                         | 2 ×10 <sup>-16</sup> |
| Within Groups            |                 | 1.360                                 | 48                             | 0.028           |                               |                      |
| Total                    |                 | 8.662                                 | 49                             |                 |                               |                      |

**Table S7.** Results of ANOVA test for interaction patterns of proteins from P2R1 and P2R2 networks.

| CNV | genes | Interacting partners in P2R1 and P2R2 |
|-----|-------|---------------------------------------|
|-----|-------|---------------------------------------|

| Entrez<br>Gene ID        | Official<br>Symbol | Total<br>Partners | Count of<br>Unique to<br>One<br>Network | Freq of<br>Network | Shared by<br>Two<br>Networks | Freq of<br>Networks |
|--------------------------|--------------------|-------------------|-----------------------------------------|--------------------|------------------------------|---------------------|
| 8214                     | DGCR6              | 20                | 10                                      | 0.5000             | 10                           | 0.5000              |
| 5625                     | PRODH              | 2                 | 2                                       | 1.0000             | 0                            | 0.0000              |
| 8220                     | ESS2               | 9                 | 5                                       | 0.5556             | 4                            | 0.4444              |
| 23617                    | TSSK2              | 2                 | 1                                       | 0.5000             | 1                            | 0.5000              |
| 6576                     | SLC25A1            | 4                 | 4                                       | 1.0000             | 0                            | 0.0000              |
| 8218                     | CLTCL1             | 1                 | 0                                       | 0.0000             | 1                            | 1.0000              |
| 7290                     | HIRA               | 6                 | 3                                       | 0.5000             | 3                            | 0.5000              |
| 64976                    | MRPL40             | 11                | 5                                       | 0.4545             | 6                            | 0.5455              |
| 128977                   | C22orf39           | 2                 | 2                                       | 1.0000             | 0                            | 0.0000              |
| 7353                     | UFD1L              | 25                | 13                                      | 0.5200             | 12                           | 0.4800              |
| 8318                     | CDC45              | 10                | 3                                       | 0.3000             | 7                            | 0.7000              |
| 5413                     | SEPT5              | 2                 | 0                                       | 0.0000             | 2                            | 1.0000              |
| 2812                     | GP1BB              | 2                 | 2                                       | 1.0000             | 0                            | 0.0000              |
| 54584                    | GNB1L              | 2                 | 2                                       | 1.0000             | 0                            | 0.0000              |
| 10587                    | TXNRD2             | 1                 | 1                                       | 1.0000             | 0                            | 0.0000              |
| 1312                     | COMT               | 3                 | 3                                       | 1.0000             | 0                            | 0.0000              |
| 421                      | ARVCF              | 4                 | 4                                       | 1.0000             | 0                            | 0.0000              |
| 128989                   | TANGO<br>2         | 5                 | 4                                       | 0.8000             | 1                            | 0.2000              |
| 54487                    | DGCR8              | 28                | 8                                       | 0.2857             | 20                           | 0.7143              |
| 27037                    | TRMT2A             | 8                 | 2                                       | 0.2500             | 6                            | 0.7500              |
| 5902                     | RANBP1             | 9                 | 8                                       | 0.8889             | 1                            | 0.1111              |
| 65078                    | RTN4R              | 1                 | 0                                       | 0.0000             | 1                            | 1.0000              |
| 85359                    | DGCR6L             | 2                 | 2                                       | 1.0000             | 0                            | 0.0000              |
| Summary ANOVA Test:      |                    |                   |                                         |                    |                              |                     |
| Groups                   |                    | Count             |                                         | Sum                | Average                      | Variance            |
| Frequency of interactors |                    |                   |                                         |                    |                              |                     |
| Unique to 1 network      |                    | 23                |                                         | 14.555             | 0.6328                       | 0.1559              |
| Shared by 2 network      |                    | 23                |                                         | 8.4453             | 0.3672                       | 0.1359              |
| Result:                  |                    |                   |                                         |                    |                              |                     |
| Source of variation      |                    | SS                | df                                      | MS                 | F                            | p-value             |
| Between Groups           |                    | 0.811             | 1                                       | 0.8114             | 5.971                        | 0.0186              |
| Within Groups            |                    | 5.979             | 44                                      | 0.1359             |                              |                     |
| Total                    |                    | 6.79              | 45                                      |                    |                              |                     |

**Table S8.** Top 3 significant terms of biological process for proteins from P2R1 network.

| Term       | Description                            | Log(q-value) | Gene Count | Symbols                                                                                                                                                              |
|------------|----------------------------------------|--------------|------------|----------------------------------------------------------------------------------------------------------------------------------------------------------------------|
| GO:0006415 | translational<br>termination           | 17.899       | 20         | MRPL58, UPF1, MRPL46, MRPL15, MRPL2, MRPL37,<br>MRPL51, MRPL39, MRPL50, MRPL16, AURKAIP1,<br>MRPL47, MRPL14, MRPL40, MRPL11, MRPL9, MRPL1,<br>MRPL24, MRPL52, MRPL21 |
| GO:0006270 | DNA<br>replication<br>initiation       | -9.530       | 10         | CDK2, MCM3, MCM4, MCM7, ORC1, ORC2, POLA1,<br>CDC45, ORC6, MCM10                                                                                                     |
| GO:0007346 | regulation of<br>mitotic cell<br>cycle | -4.366       | 21         | BRCA2, CDK2, RCC1, HSPA2, MECP2, ORC1, PCNA,<br>PLRG1, PSMD2, PSMD7, RANBP1, CDC45, RAE1, CEP57,                                                                     |

CTDSPL, CARM1, PHB2, CHMP2A, AURKAIP1, HAUS7, NSFL1C

**Table S9.** Top 3 significant terms of biological process for proteins from P2R2 network.

| Term       | Description                      | Log(q-value) | Gene Count | Symbols                                                                                                                                     |
|------------|----------------------------------|--------------|------------|---------------------------------------------------------------------------------------------------------------------------------------------|
| GO:0006415 | translational termination        | -13.378      | 18         | MRPL58, UPF1, MRPL15, MRPL2, MRPL37, MRPL51, MRPL39, MRPL50, MRPL47, MRPL14, MRPL40, MRPL32, MRPL11, MRPL9, MRPL1, MRPL24, MRPL52, MRPL21   |
| GO:0006270 | DNA replication initiation       | -8.664       | 10         | CDK2, MCM3, MCM4, MCM6, MCM7, ORC1, POLA1, CDC45, ORC6, MCM10                                                                               |
| GO:0007346 | regulation of mitotic cell cycle | 5.88894      | 21         | ASNS, BRCA2, CDK2, RCC1, ORC1, PCNA, PLRG1, PML, PSMD7, RANBP1, RDX, TUBA4A, CDC45, RAE1, CEP57, CTDSPL, CARM1, PHB2, CHMP2A, HAUS7, NSFL1C |

**Table S10.** Top 3 significant terms of biological process for proteins from P4R1 network.

| Term       | Description         | Log(q-value) | Gene Count | Symbols                                                                                                                                                                                                                                                                   |
|------------|---------------------|--------------|------------|---------------------------------------------------------------------------------------------------------------------------------------------------------------------------------------------------------------------------------------------------------------------------|
| GO:0006412 | translation         | -9.371       | 37         | DHX9, EGFR, ELAVL1, GAPDH, GARS1, HNRNPD, HSPB1, MRPL58, ILF3, MOV10, NCL, RBM4, RGS2, RPL9, RPL13, RPS5, HNRNPR, MRPL28, LARP1, PPA2, RBMS3, MRPL2, MRPL4, MRPL51, DPH5, MRPL39, AURKAIP1, NAT10, ZC3H15, MRPL14, MRPL41, MRPL40, MRPL38, MRPL32, MRPL24, MRPL52, MRPL55 |
| GO:0008380 | RNA splicing        | -8.382       | 28         | DDX5, DHX9, DHX15, ELAVL2, ELAVL1, FUS, HNRNPD, HNRNPH1, HNRNPU, HSPA8, PPP2R1A, RBM4, SMN1, SRPK1, SRPK2, ESS2, DHX16, PRPF4, MPHOSPH10, HNRNPR, DDX17, PAPOLA, HNRNPUL1, PRPF19, RTCB, SRRT, RBM28, USB1                                                                |
| GO:0042254 | ribosome biogenesis | -7.933       | 22         | DDX10, DKC1, NOP2, NVL, RPS5, DDX18, BTRC, MPHOSPH10, NSA2, DDX17, DHX30, GTPBP4, DROSHA, GNL2, PAK1IP1, NAT10, BRX1, DDX24, TENT4B, DDX31, NOL10, UTP23                                                                                                                  |

**Table S11.** Enrichment analysis of *de novo* mutation genes from 22q11.21 spatiotemporal networks.

| Number of Genes within 22q11.21 Spatiotemporal Networks | Number of Autism <i>de novo</i> Mutation Genes | Number of Autism <i>de novo</i> Mutation Genes in Networks              | Fisher Exact p-Value    | Benjamini-Hochberg adj p-Value |
|---------------------------------------------------------|------------------------------------------------|-------------------------------------------------------------------------|-------------------------|--------------------------------|
| 994                                                     | 239                                            | 34                                                                      | 2.814×10 <sup>-7</sup>  | 1.0299 ×10 <sup>-6</sup>       |
| Number of Genes within 22q11.21 Spatiotemporal Networks | Number of FMRP <i>de novo</i> Mutation Genes   | Number of FMRP <i>de novo</i> Mutation Genes in Spatiotemporal Networks | Fisher Exact p-Value    | Benjamini-Hochberg adj p-Value |
| 994                                                     | 839                                            | 80                                                                      | 3.433 ×10 <sup>-7</sup> | 1.0299 ×10 <sup>-6</sup>       |

| Number of Genes within 22q11.21 Spatiotemporal Networks | Number of Voltage-Gated Calcium Channel Complexes <i>de novo</i> Mutation Genes | Number of Voltage-gated Calcium Channel Complexes <i>de novo</i> Mutation Genes in Spatiotemporal Networks | Fisher Exact p-Value | Benjamini-Hochberg adj p-Value |
|---------------------------------------------------------|---------------------------------------------------------------------------------|------------------------------------------------------------------------------------------------------------|----------------------|--------------------------------|
| 994                                                     | 206                                                                             | 23                                                                                                         | 0.0007124            | 1.42×10 <sup>-3</sup>          |

  

| Number of Genes within 22q11.21 Spatiotemporal Networks | Number of Developmental Delay <i>de novo</i> Mutation Ggenes | Number of Developmental Delay <i>de novo</i> Mutation Genes in Spatiotemporal Networks | Fisher Exact p-Value | Benjamini-Hochberg adj p-Value |
|---------------------------------------------------------|--------------------------------------------------------------|----------------------------------------------------------------------------------------|----------------------|--------------------------------|
| 994                                                     | 1291                                                         | 74                                                                                     | 0.1867               | 0.224                          |

  

| Number of Genes Within 22q11.21 Spatiotemporal Networks | Number of Electrophysiology Genes | Number of Electrophysiology Genes in Spatiotemporal Networks | Fisher Exact p-Value | Benjamini-Hochberg adj p-Value |
|---------------------------------------------------------|-----------------------------------|--------------------------------------------------------------|----------------------|--------------------------------|
| 994                                                     | 213                               | 6                                                            | 0.254                | 0.254                          |

  

| Number of Genes within 22q11.21 Spatiotemporal Networks | Number of Long-Term Potentiation-Associated Genes | Number of Long-term Potentiation-Associated Genes in Spatiotemporal Networks | Fisher Exact p-Value | Benjamini-Hochberg adj p-value |
|---------------------------------------------------------|---------------------------------------------------|------------------------------------------------------------------------------|----------------------|--------------------------------|
| 994                                                     | 157                                               | 13                                                                           | 0.06824              | 0.10236                        |

Table S12. Parameters of P4R1 network.

| Entrez Gene ID | Name    | Betweenness Centrality | Eccentricity |
|----------------|---------|------------------------|--------------|
| 8214           | DGCR6   | 0.63989899             | 3            |
| 6576           | SLC25A1 | 0.61403509             | 3            |
| 7290           | HIRA    | 0.1207001              | 5            |
| 64976          | MRPL40  | 0.80808081             | 5            |
| 7353           | UFD1L   | 0.49880895             | 5            |
| 1312           | COMT    | 0.78947368             | 3            |
| 54487          | DGCR8   | 0.81570979             | 3            |
| 85359          | DGCR6L  | 0.04494949             | 5            |

**Note:** PRODH, TSSK2, CLTCL1, C22orf39, CLDN5, SEPT5, GP1BB, TXNRD2, ARVCF, TANGO2, TRMT2A, RANBP1, RTN4R were excluded because of isolating from the network.
